# Supplementary material for: microRNA and Metabolite Signatures Linked to Early Consequences of Lethal Radiation
Source: PubMed Central journal article supplement (PMC7096415; doi:10.1038/s41598-020-62255-w), 2020-03-25

# ***micro*RNA and Metabolite Signatures Linked to Early Consequences of Lethal Radiation**

Nabarun Chakraborty<sup>1,2</sup>, Aarti Gautam<sup>2</sup>, Gregory P. Holmes-Hampton<sup>5</sup>, Vidya P. Kumar<sup>5</sup>, Shukla Biswas<sup>5</sup>, Raina Kumar<sup>3</sup>, Dana Hamad<sup>4</sup>, George Dimitrov<sup>1,2</sup>, Ayodele O. Olabisi<sup>5</sup>, Rasha Hammamieh<sup>2</sup>, and Sanchita P. Ghosh<sup>5</sup>

<sup>1</sup>The Geneva Foundation, US Army Center for Environmental Health Research, Fort Detrick, MD, 21702-5010, <sup>2</sup>US Army Center for Environmental Health Research, Fort Detrick, MD, 21702-5010, <sup>3</sup>ABCC, Fredrick National Lab for Cancer Research, Fort Detrick, MD, 21702-5010, <sup>4</sup>ORISE, US Army Center for Environmental Health Research, Fort Detrick, MD, 21702-5010, <sup>5</sup>Armed Forces Radiobiology Research Institute, Uniformed Services University of the Health Sciences, Bethesda, MD 20889

# Supplementary Figure S1

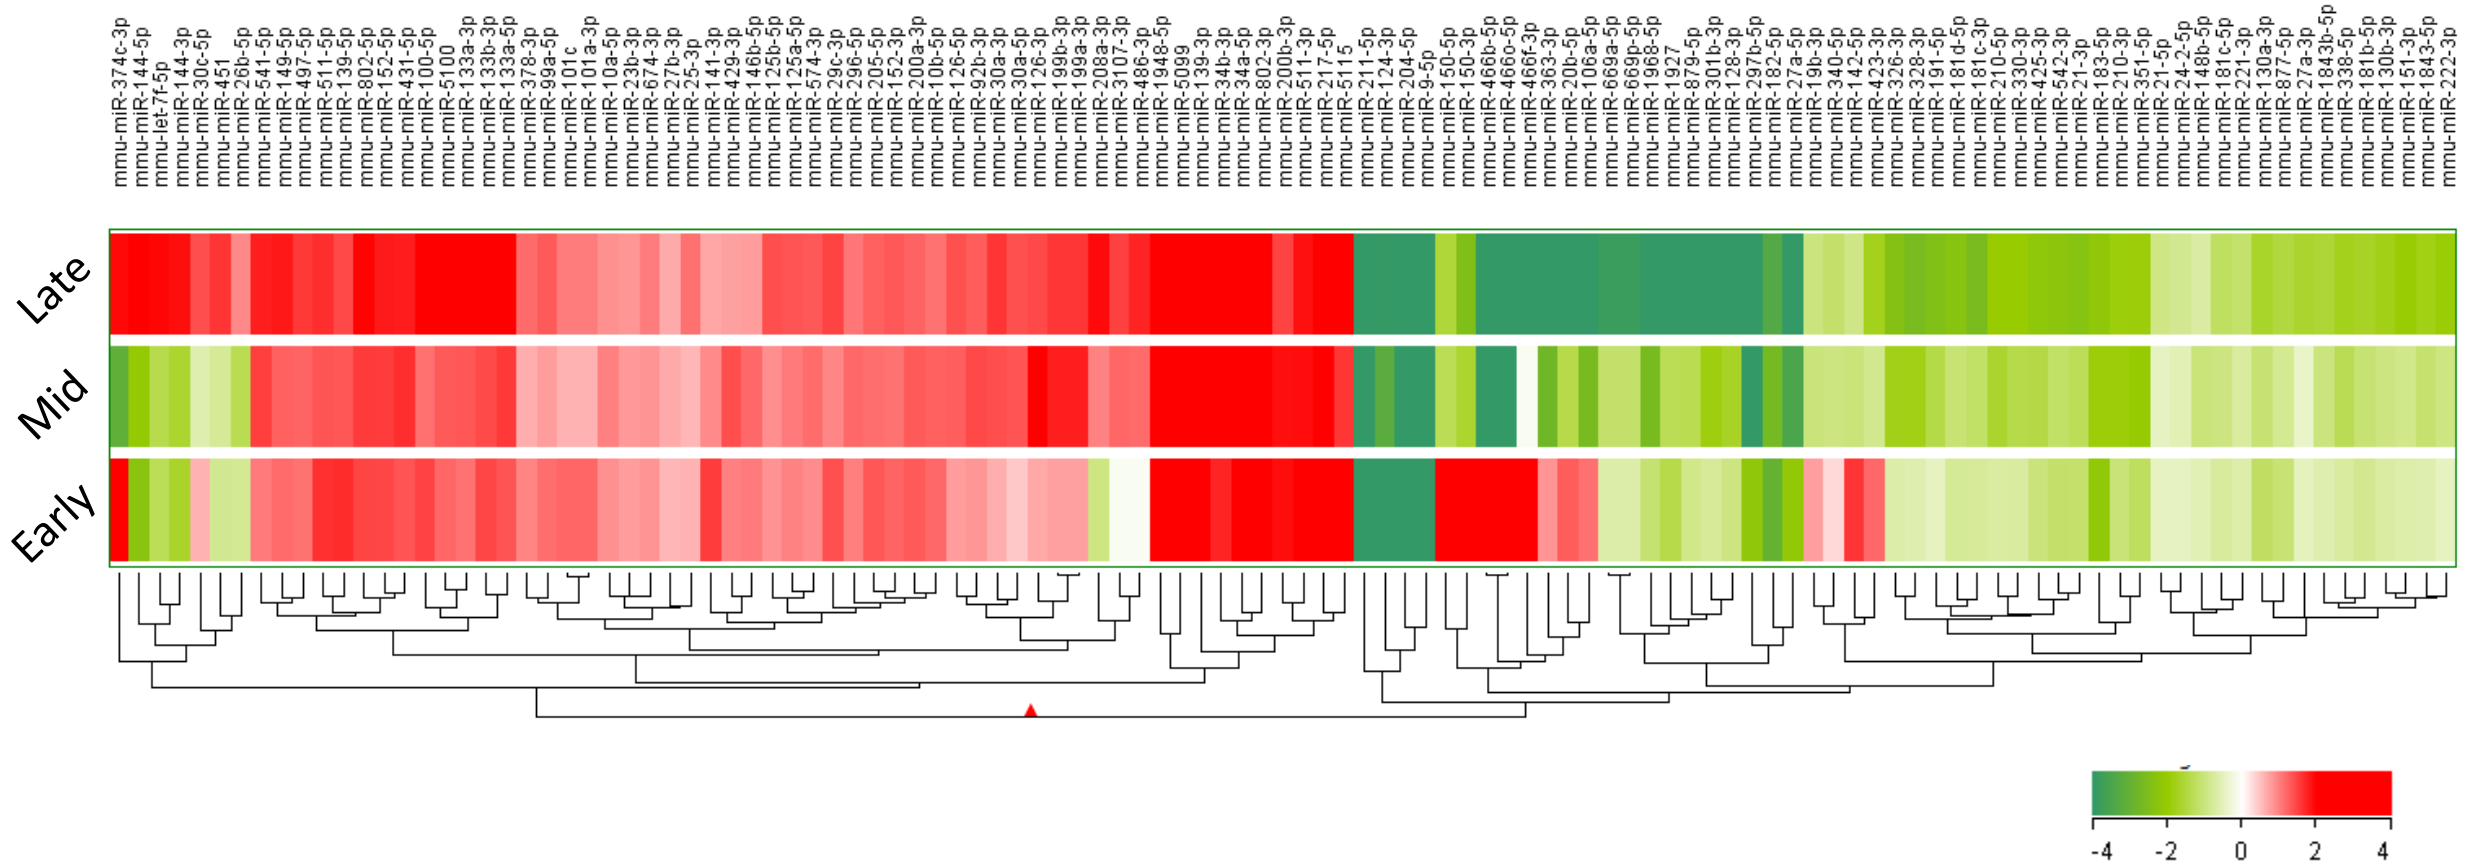

Supplementary Figure S2.

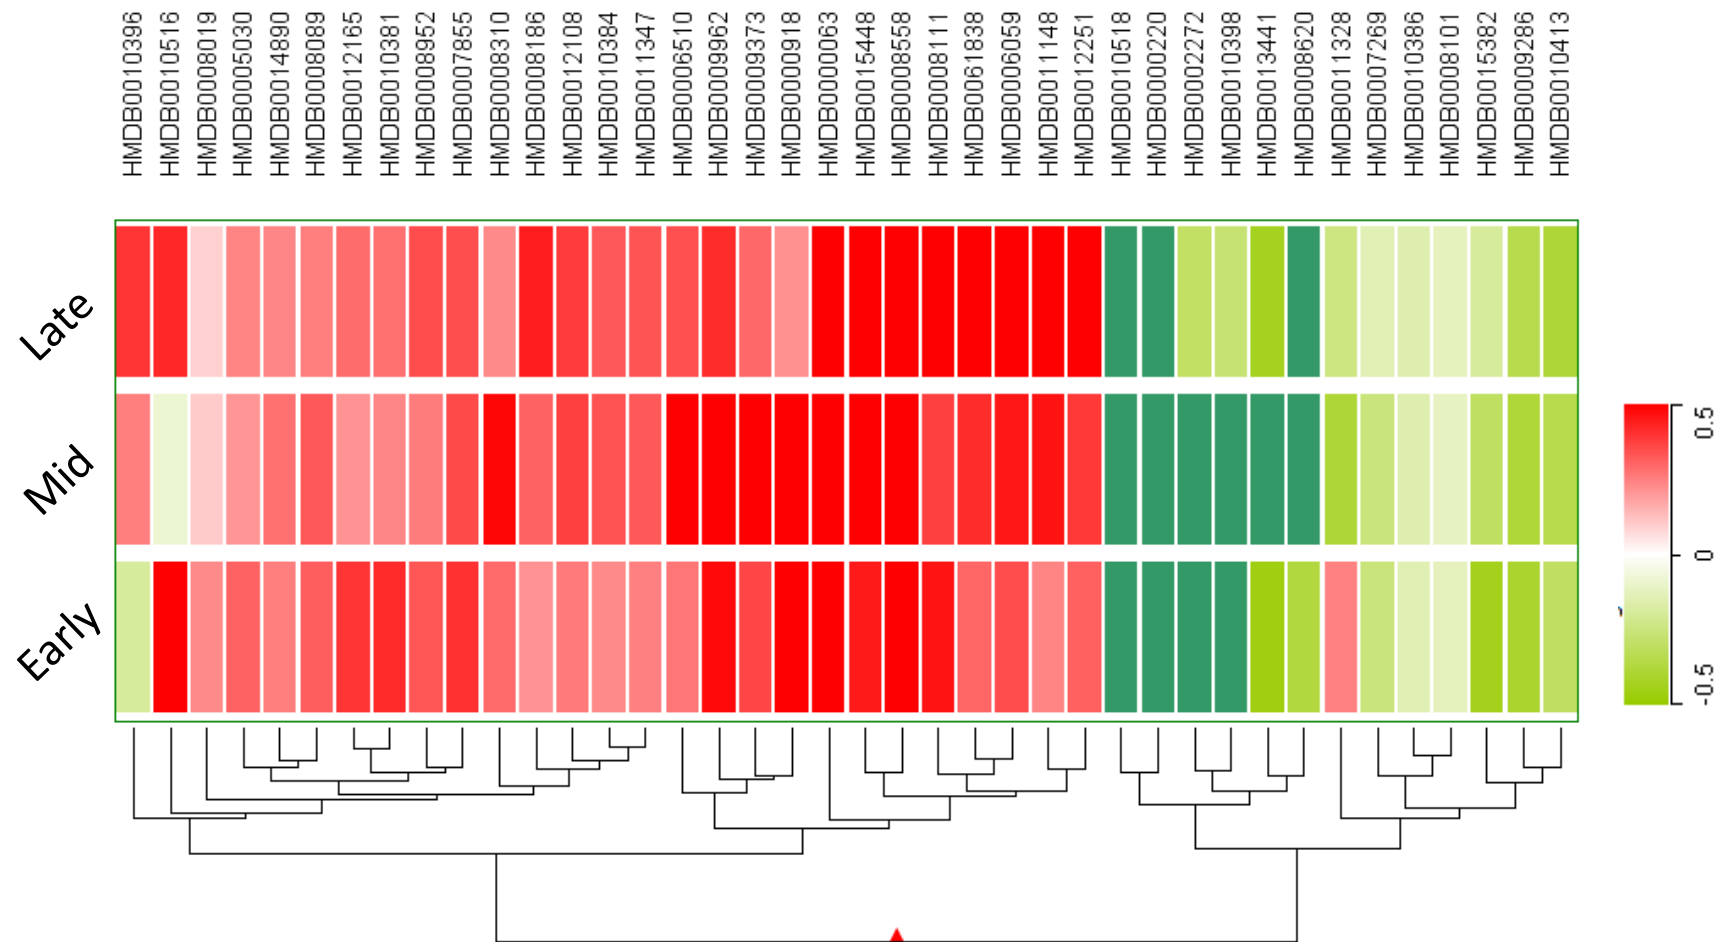

Supplementary Figure S3.

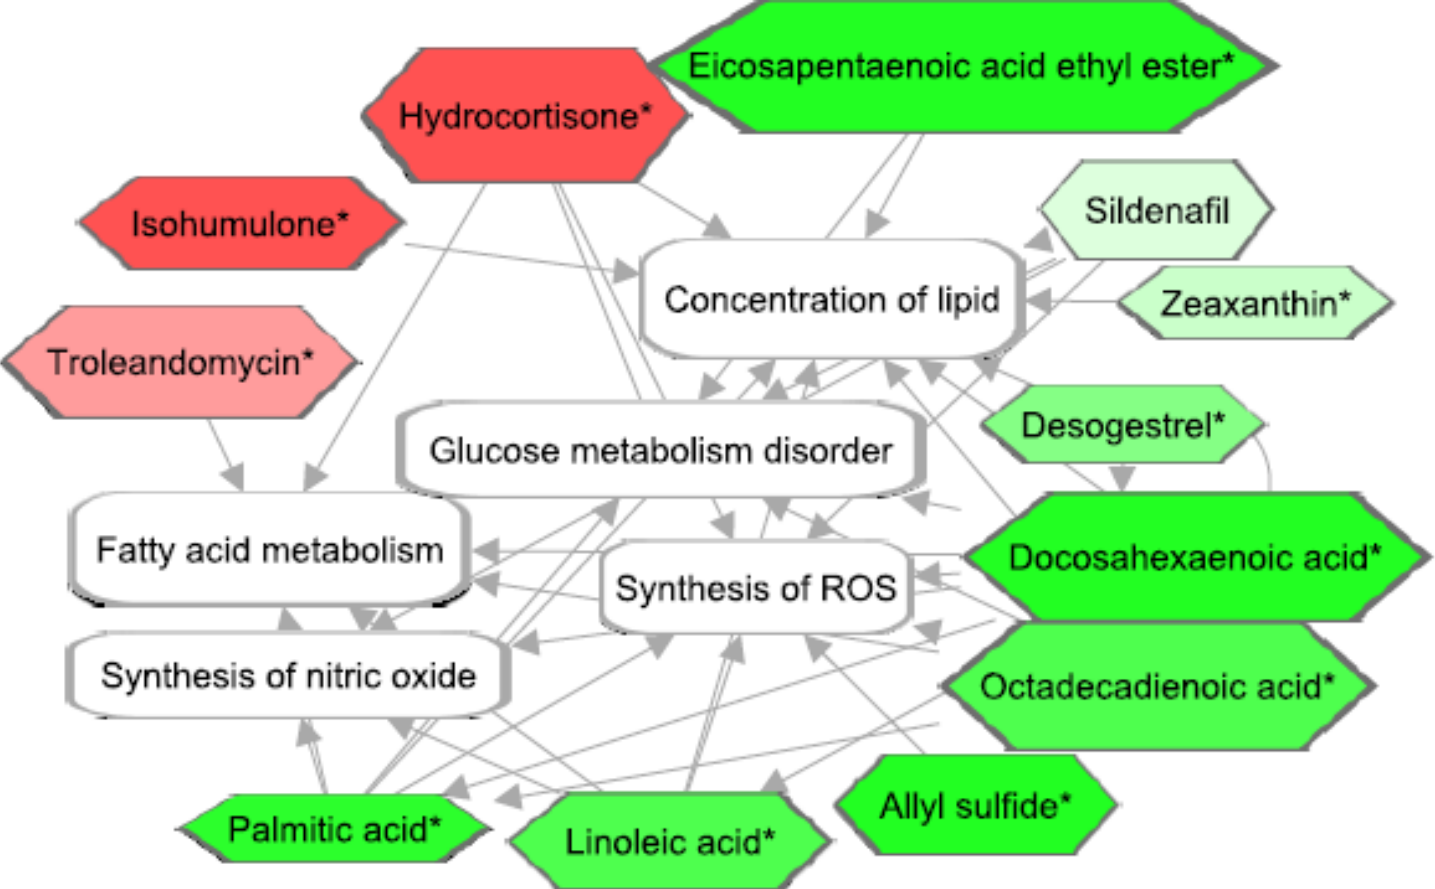

Supplementary Figure S4.

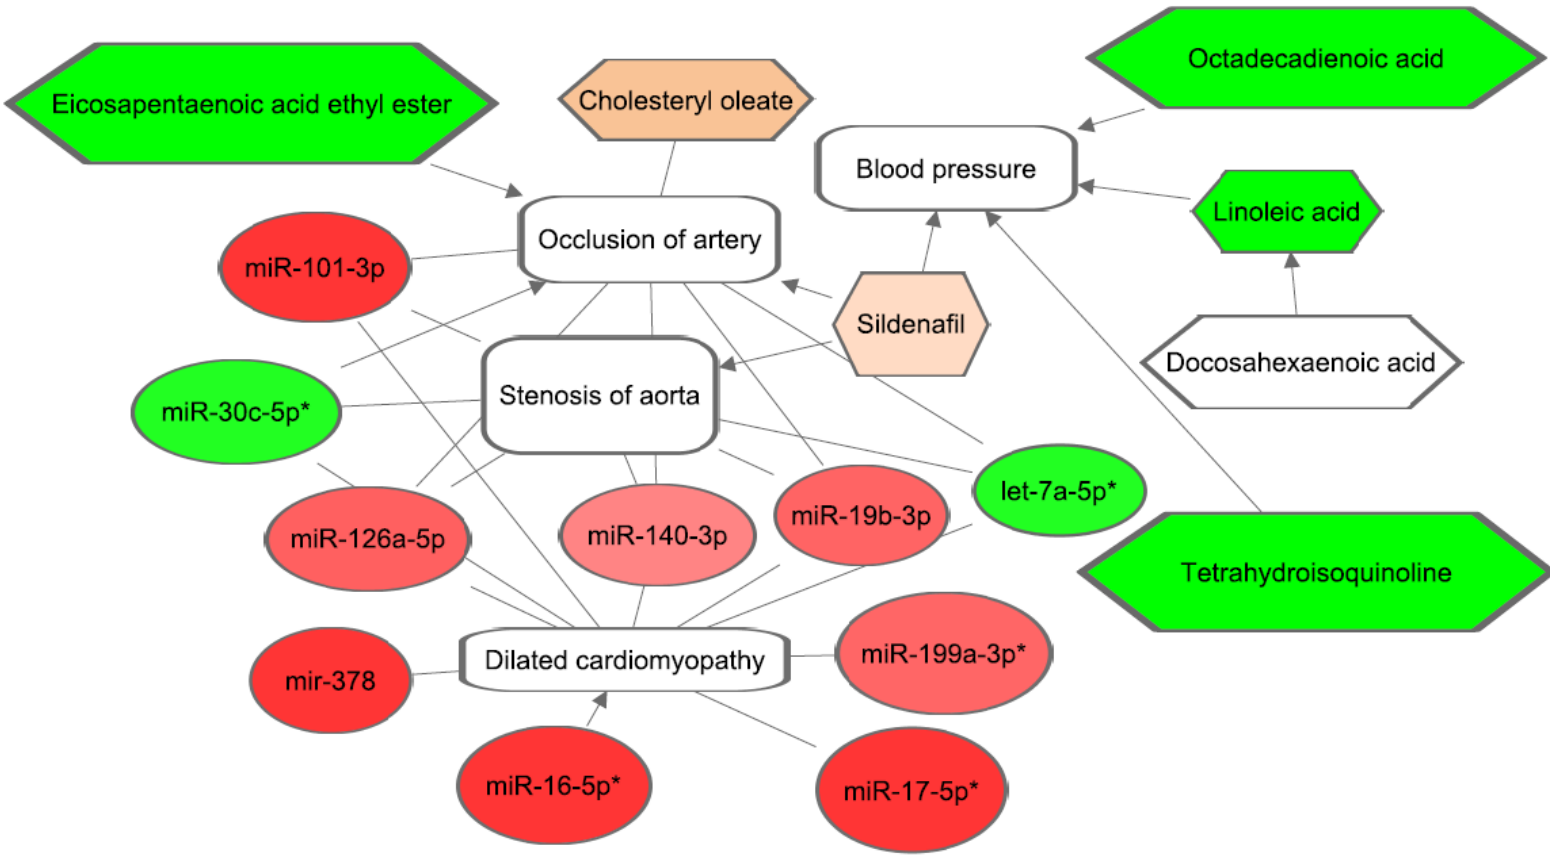

Supplementary Figure S5A.

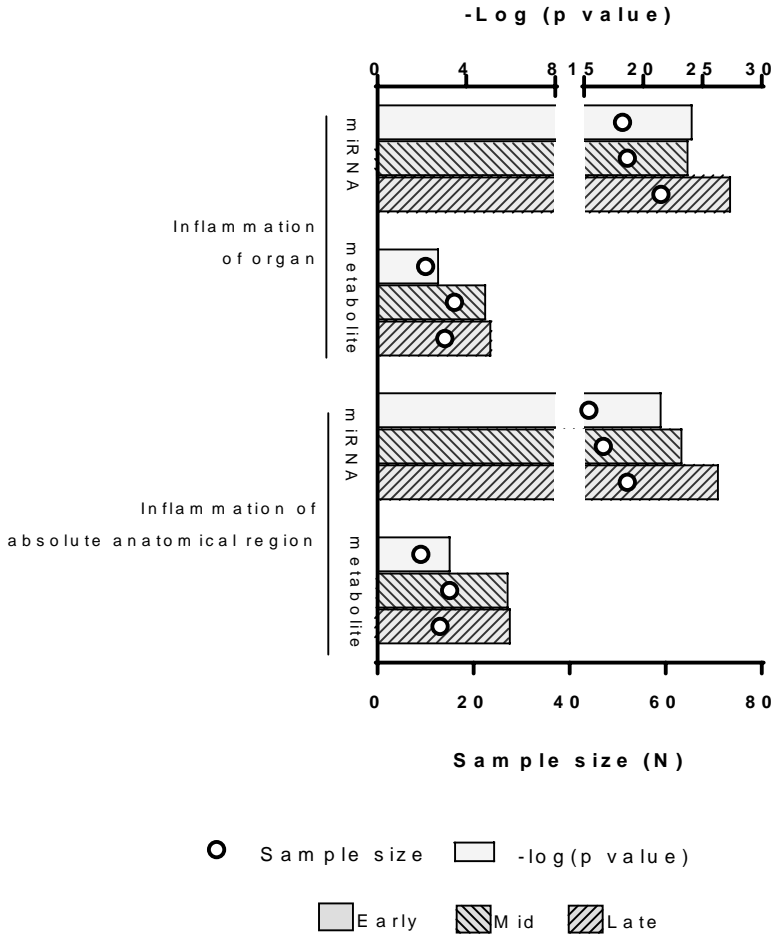

Supplementary Figure S5B.

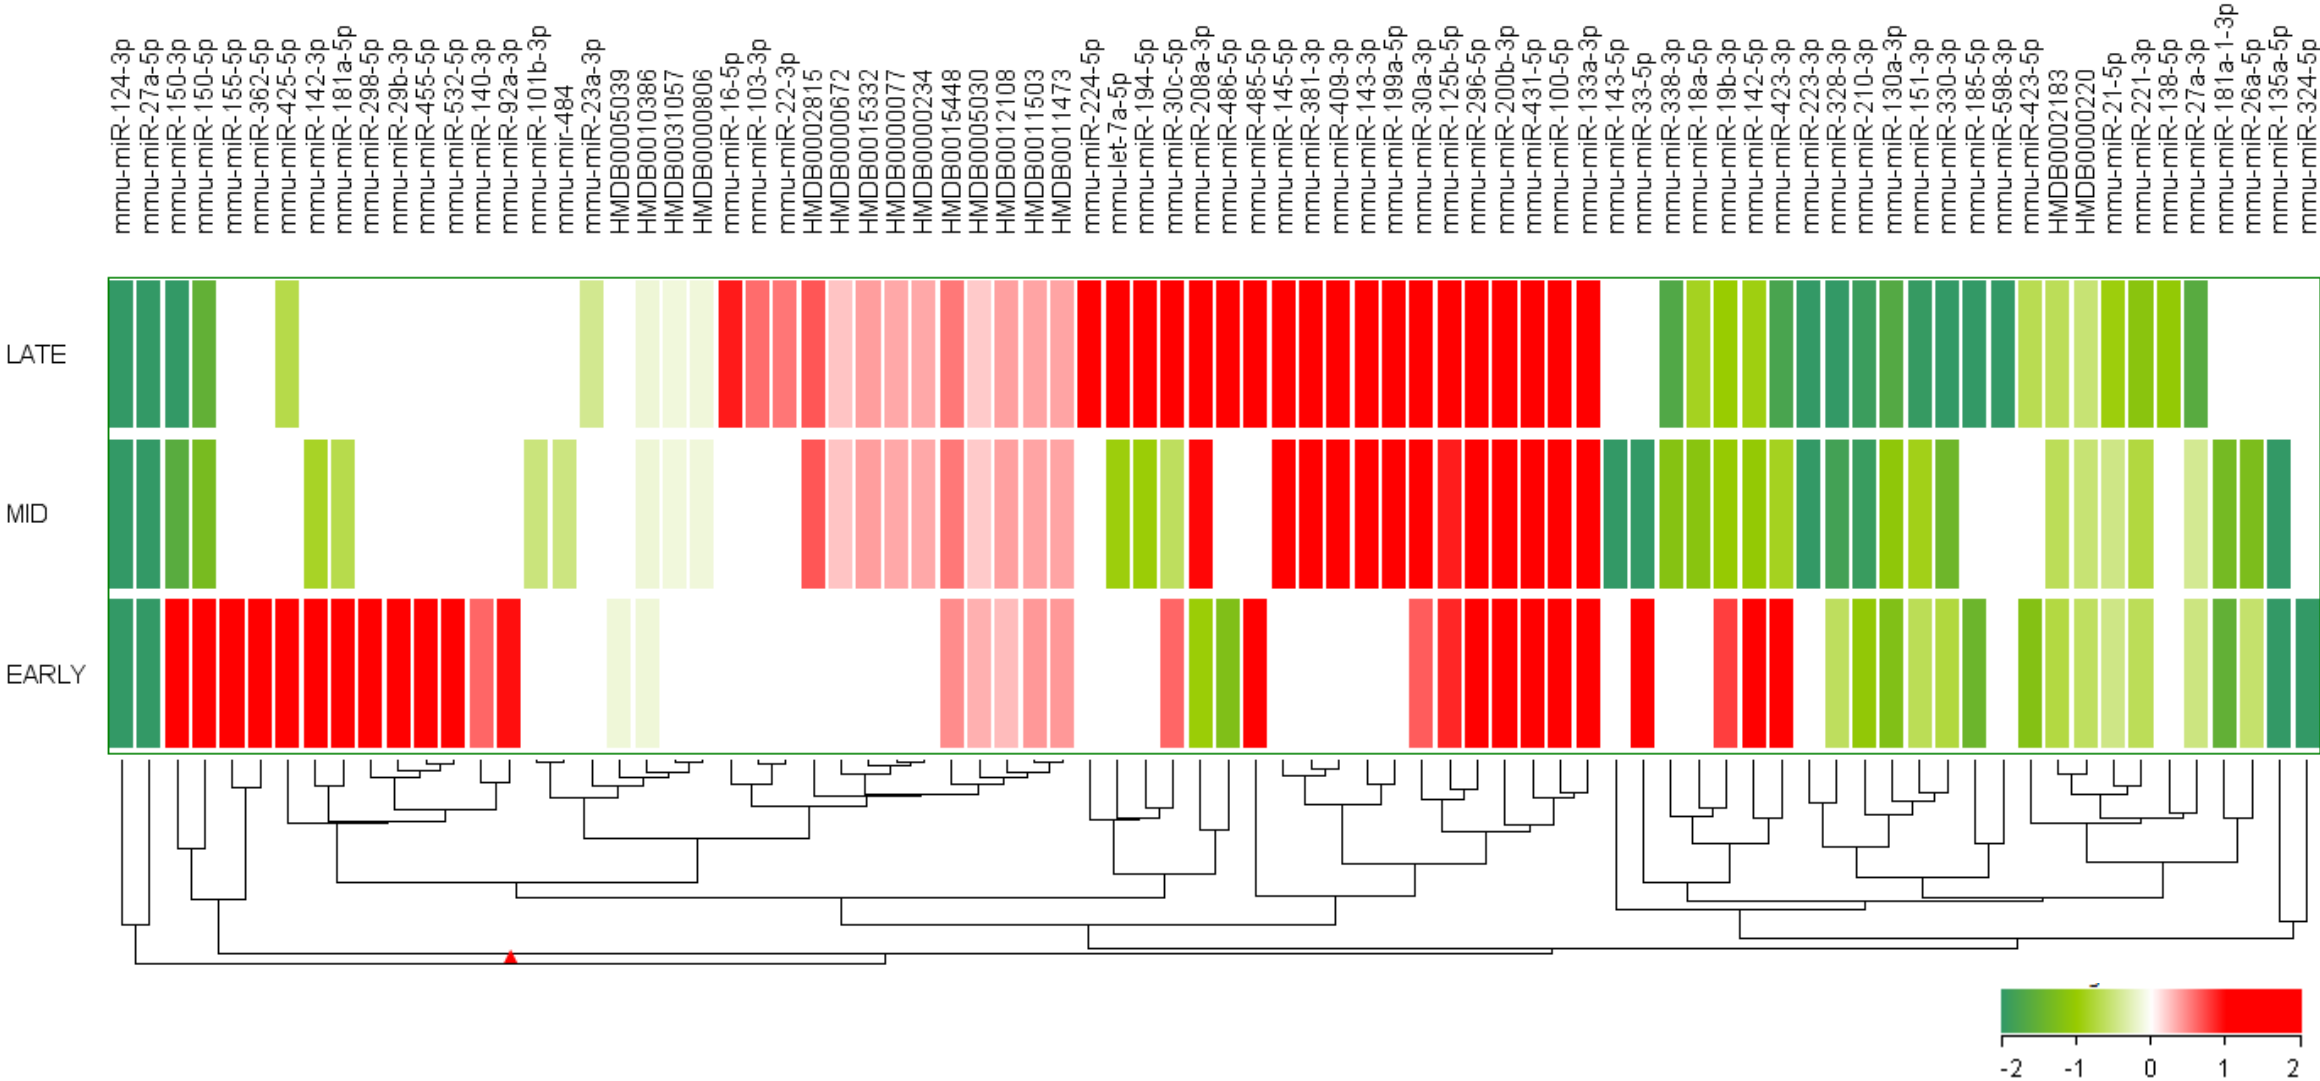

Supplement: 41598_2020_62255_MOESM1_ESM.pdf [file 41598_2020_62255_MOESM1_ESM.pdf]
